# Supplementary material
Source: MDPI journal article supplement (https://www.mdpi.com/2073-4441/12/5/1295)
Supplement: s1 [file s1]

## Aldo Tamburrino and Cristóbal Traslaviña

[illegible]

|    |     |      |      |      |       |        |       |        |          |       |      |              |     |   |        |        |       |       |     |    |       |      |       |      |       |       |      |      |
|----|-----|------|------|------|-------|--------|-------|--------|----------|-------|------|--------------|-----|---|--------|--------|-------|-------|-----|----|-------|------|-------|------|-------|-------|------|------|
| 14 | 93  | 2.86 | 0.03 | 2700 | 0.226 | 0.002  | 0.662 | 0.001  | 992,996  | -9.63 | 0.1  | .No-motion'  | 441 | 1 | 0.0218 | 0.0005 | 0.073 | 0.003 | 230 | 12 | 5.47  | 0.6  | 40,84 | 0.86 | 3,720 | 0,061 | 2,17 | 0,16 |
| 14 | 94  | 2.86 | 0.03 | 2700 | 0.226 | 0.002  | 0.662 | 0.001  | 993,044  | -9.63 | 0.1  | Incipient'   | 483 | 1 | 0.0218 | 0.0005 | 0.077 | 0.003 | 260 | 13 | 5.77  | 0.63 | 40,84 | 0.86 | 3,924 | 0,063 | 2,24 | 0,17 |
| 14 | 95  | 2.86 | 0.03 | 2700 | 0.226 | 0.002  | 0.662 | 0.001  | 999,492  | -9.63 | 0.1  | Generalized' | 544 | 1 | 0.0218 | 0.0005 | 0.083 | 0.004 | 305 | 16 | 6.26  | 0.7  | 40,81 | 0.86 | 4,257 | 0,065 | 2,38 | 0,18 |
| 15 | 96  | 2.86 | 0.03 | 2700 | 0.216 | 0.0002 | 0.665 | 0.0004 | 998,321  | 10.41 | 0.08 | .No-motion'  | 110 | 1 | 0.0218 | 0.0005 | 0.030 | 0.002 | 37  | 2  | 2.26  | 0.26 | 43,20 | 0.75 | 2,961 | 0,054 | 1,93 | 0,15 |
| 15 | 97  | 2.86 | 0.03 | 2700 | 0.216 | 0.0002 | 0.665 | 0.0004 | 993,904  | 10.41 | 0.08 | .No-motion'  | 184 | 1 | 0.0218 | 0.0005 | 0.04  | 0.002 | 74  | 4  | 3,000 | 0.33 | 43,21 | 0.75 | 3,930 | 0,063 | 2,33 | 0,18 |
| 15 | 98  | 2.86 | 0.03 | 2700 | 0.216 | 0.0002 | 0.665 | 0.0004 | 992,605  | 10.41 | 0.08 | .No-motion'  | 291 | 1 | 0.0218 | 0.0005 | 0.051 | 0.002 | 136 | 7  | 3.82  | 0.42 | 43,22 | 0.75 | 5,004 | 0,071 | 2,74 | 0,21 |
| 15 | 99  | 2.86 | 0.03 | 2700 | 0.216 | 0.0002 | 0.665 | 0.0004 | 991,695  | 10.41 | 0.08 | .No-motion'  | 383 | 1 | 0.0218 | 0.0005 | 0.060 | 0.002 | 197 | 10 | 4.49  | 0.49 | 43,22 | 0.75 | 5,882 | 0,077 | 3,05 | 0,22 |
| 15 | 100 | 2.86 | 0.03 | 2700 | 0.216 | 0.0002 | 0.665 | 0.0004 | 1001,040 | 10.41 | 0.08 | Incipient'   | 428 | 1 | 0.0218 | 0.0005 | 0.065 | 0.003 | 228 | 12 | 4.91  | 0.54 | 43,19 | 0.75 | 6,432 | 0,080 | 3,25 | 0,24 |
| 15 | 101 | 2.86 | 0.03 | 2700 | 0.216 | 0.0002 | 0.665 | 0.0004 | 994,812  | 10.41 | 0.08 | Generalized' | 489 | 1 | 0.0218 | 0.0005 | 0.073 | 0.003 | 273 | 14 | 5.48  | 0.59 | 43,21 | 0.75 | 7,179 | 0,085 | 3,48 | 0,26 |
| 16 | 102 | 1.98 | 0.03 | 2700 | 0.314 | 0.016  | 0.63  | 0.009  | 1008,096 | 0.65  | 0.07 | .No-motion'  | 82  | 1 | 0.0186 | 0.0005 | 0.039 | 0.003 | 22  | 2  | 2.62  | 0.38 | 13,98 | 1.31 | 2,672 | 0,051 | 1,09 | 0,13 |
| 16 | 103 | 1.98 | 0.03 | 2700 | 0.314 | 0.016  | 0.63  | 0.009  | 1009,495 | 0.65  | 0.07 | .No-motion'  | 145 | 1 | 0.0186 | 0.0005 | 0.055 | 0.003 | 47  | 4  | 3.7   | 0.48 | 13,98 | 1.31 | 3,774 | 0,061 | 1,38 | 0,15 |
| 16 | 104 | 1.98 | 0.03 | 2700 | 0.314 | 0.016  | 0.63  | 0.009  | 1008,737 | 0.65  | 0.07 | .No-motion'  | 228 | 1 | 0.0186 | 0.0005 | 0.072 | 0.003 | 87  | 7  | 4.84  | 0.61 | 13,98 | 1.31 | 4,937 | 0,070 | 1,66 | 0,18 |
| 16 | 105 | 1.98 | 0.03 | 2700 | 0.314 | 0.016  | 0.63  | 0.009  | 1001,033 | 0.65  | 0.07 | Incipient'   | 267 | 1 | 0.0186 | 0.0005 | 0.079 | 0.003 | 108 | 9  | 5.27  | 0.66 | 14,00 | 1.31 | 5,375 | 0,073 | 1,76 | 0,19 |
| 16 | 106 | 1.98 | 0.03 | 2700 | 0.314 | 0.016  | 0.63  | 0.009  | 1008,468 | 0.65  | 0.07 | Generalized' | 348 | 1 | 0.0186 | 0.0005 | 0.093 | 0.003 | 156 | 12 | 6.25  | 0.76 | 13,98 | 1.31 | 6,375 | 0,080 | 1,98 | 0,21 |
| 16 | 107 | 1.98 | 0.03 | 2700 | 0.314 | 0.016  | 0.63  | 0.009  | 1004,362 | 0.65  | 0.07 | Generalized' | 407 | 1 | 0.0186 | 0.0005 | 0.101 | 0.002 | 193 | 15 | 6.76  | 0.81 | 13,99 | 1.31 | 6,895 | 0,083 | 2,09 | 0,22 |
| 17 | 108 | 1.98 | 0.03 | 2700 | 0.25  | 0.001  | 0.649 | 0.001  | 1009,495 | -9.38 | 0.06 | .No-motion'  | 71  | 1 | 0.0186 | 0.0005 | 0.033 | 0.001 | 21  | 1  | 2.22  | 0.28 | 17,91 | 0.47 | 1,532 | 0,039 | 0,89 | 0,08 |
| 17 | 109 | 1.98 | 0.03 | 2700 | 0.25  | 0.001  | 0.649 | 0.001  | 1014,199 | -9.38 | 0.06 | .No-motion'  | 194 | 1 | 0.0186 | 0.0005 | 0.058 | 0.001 | 81  | 5  | 3.92  | 0.47 | 17,90 | 0.47 | 2,705 | 0,052 | 1,30 | 0,11 |
| 17 | 110 | 1.98 | 0.03 | 2700 | 0.25  | 0.001  | 0.649 | 0.001  | 1003,386 | -9.38 | 0.06 | .No-motion'  | 248 | 1 | 0.0186 | 0.0005 | 0.067 | 0.001 | 114 | 7  | 4.48  | 0.53 | 17,92 | 0.47 | 3,091 | 0,056 | 1,42 | 0,12 |
| 17 | 111 | 1.98 | 0.03 | 2700 | 0.25  | 0.001  | 0.649 | 0.001  | 1008,956 | -9.38 | 0.06 | Incipient'   | 305 | 1 | 0.0186 | 0.0005 | 0.076 | 0.001 | 150 | 9  | 5.11  | 0.61 | 17,91 | 0.47 | 3,526 | 0,059 | 1,56 | 0,13 |
| 17 | 112 | 1.98 | 0.03 | 2700 | 0.25  | 0.001  | 0.649 | 0.001  | 1010,288 | -9.38 | 0.06 | Generalized' | 374 | 1 | 0.0186 | 0.0005 | 0.086 | 0.001 | 198 | 12 | 5.79  | 0.69 | 17,91 | 0.47 | 3,995 | 0,063 | 1,69 | 0,14 |
| 17 | 113 | 1.98 | 0.03 | 2700 | 0.25  | 0.001  | 0.649 | 0.001  | 1003,119 | -9.38 | 0.2  | Generalized' | 415 | 1 | 0.0186 | 0.0005 | 0.092 | 0.001 | 228 | 14 | 6.15  | 0.73 | 17,92 | 0.47 | 4,244 | 0,065 | 1,76 | 0,14 |
| 18 | 114 | 1.98 | 0.03 | 2700 | 0.251 | 0.0002 | 0.648 | 0.0004 | 1007,218 | 10.26 | 0.2  | .No-motion'  | 64  | 1 | 0.0206 | 0.0005 | 0.023 | 0.003 | 17  | 1  | 1.68  | 0.31 | 17,89 | 0.44 | 2,201 | 0,047 | 1,13 | 0,14 |
| 18 | 115 | 1.98 | 0.03 | 2700 | 0.251 | 0.0002 | 0.648 | 0.0004 | 1001,871 | 10.26 | 0.2  | .No-motion'  | 115 | 1 | 0.0186 | 0.0005 | 0.034 | 0.003 | 40  | 2  | 2.27  | 0.35 | 17,90 | 0.44 | 2,974 | 0,054 | 1,38 | 0,15 |
| 18 | 116 | 1.98 | 0.03 | 2700 | 0.251 | 0.0002 | 0.648 | 0.0004 | 998,225  | 10.26 | 0.2  | .No-motion'  | 185 | 1 | 0.0186 | 0.0005 | 0.046 | 0.004 | 76  | 5  | 3.06  | 0.44 | 17,91 | 0.44 | 4,009 | 0,063 | 1,69 | 0,17 |
| 18 | 117 | 1.98 | 0.03 | 2700 | 0.251 | 0.0002 | 0.648 | 0.0004 | 1005,119 | 10.26 | 0.2  | .No-motion'  | 227 | 1 | 0.0186 | 0.0005 | 0.053 | 0.004 | 101 | 6  | 3.55  | 0.48 | 17,89 | 0.44 | 4,651 | 0,068 | 1,87 | 0,17 |
| 18 | 118 | 1.98 | 0.03 | 2700 | 0.251 | 0.0002 | 0.648 | 0.0004 | 1014,042 | 10.26 | 0.2  | Incipient'   | 314 | 1 | 0.0186 | 0.0005 | 0.066 | 0.004 | 156 | 9  | 4.46  | 0.59 | 17,87 | 0.44 | 5,843 | 0,076 | 2,19 | 0,2  |
| 18 | 119 | 1.98 | 0.03 | 2700 | 0.251 | 0.0002 | 0.648 | 0.0004 | 1003,141 | 10.26 | 0.2  | Generalized' | 356 | 1 | 0.0186 | 0.0005 | 0.073 | 0.004 | 185 | 11 | 4.88  | 0.63 | 17,90 | 0.44 | 6,393 | 0,080 | 2,32 | 0,2  |
| 18 | 120 | 1.98 | 0.03 | 2700 | 0.251 | 0.0002 | 0.648 | 0.0004 | 1010,019 | 10.26 | 0.2  | Generalized' | 393 | 1 | 0.0186 | 0.0005 | 0.078 | 0.004 | 211 | 13 | 5.25  | 0.68 | 17,88 | 0.44 | 6,878 | 0,083 | 2,44 | 0,22 |
| 19 | 121 | 0.5  | 0.03 | 2650 | 0.56  | 0.01   | 0.579 | 0.004  | 1021,889 | 0     | 0.1  | .No-motion'  | 56  | 1 | 0.0356 | 0.0005 | 0.013 | 0.001 | 5   | 0  | 1.38  | 0.13 | 0,62  | 0.06 | 1,380 | 0,037 | 0,20 | 0,01 |
| 19 | 122 | 0.5  | 0.03 | 2650 | 0.56  | 0.01   | 0.579 | 0.004  | 996,133  | 0     | 0.1  | .No-motion'  | 106 | 1 | 0.0356 | 0.0005 | 0.023 | 0.001 | 11  | 0  | 2.38  | 0.2  | 0,62  | 0.06 | 2,380 | 0,049 | 0,30 | 0,02 |
| 19 | 123 | 0.5  | 0.03 | 2650 | 0.56  | 0.01   | 0.579 | 0.004  | 995,844  | 0     | 0.1  | Incipient'   | 138 | 1 | 0.0356 | 0.0005 | 0.029 | 0.001 | 16  | 1  | 3,000 | 0.23 | 0,62  | 0.06 | 3,000 | 0,055 | 0,35 | 0,02 |
| 19 | 124 | 0.5  | 0.03 | 2650 | 0.56  | 0.01   | 0.579 | 0.004  | 996,342  | 0     | 0.1  | Generalized' | 210 | 1 | 0.0356 | 0.0005 | 0.04  | 0.001 | 30  | 1  | 4.14  | 0.3  | 0,62  | 0.06 | 4,140 | 0,064 | 0,44 | 0,03 |
| 19 | 125 | 0.5  | 0.03 | 2650 | 0.56  | 0.01   | 0.579 | 0.004  | 997,030  | 0     | 0.1  | Generalized' | 343 | 1 | 0.0356 | 0.0005 | 0.056 | 0.002 | 60  | 2  | 5.8   | 0.44 | 0,62  | 0.06 | 5,800 | 0,076 | 0,56 | 0,03 |
| 20 | 126 | 0.5  | 0.03 | 2650 | 0.552 | 0.006  | 0.58  | 0.003  | 1002,187 | -9.89 | 0.03 | .No-motion'  | 65  | 1 | 0.0352 | 0.0005 | 0.016 | 0.003 | 6   | 0  | 1.65  | 0.34 | 0,63  | 0.06 | 1,155 | 0,034 | 0,18 | 0,03 |
| 20 | 127 | 0.5  | 0.03 | 2650 | 0.552 | 0.006  | 0.58  | 0.003  | 1001,394 | -9.89 | 0.03 | .No-motion'  | 107 | 1 | 0.0352 | 0.0005 | 0.023 | 0.002 | 12  | 0  | 2.37  | 0.27 | 0,63  | 0.06 | 1,659 | 0,041 | 0,23 | 0,02 |
| 20 | 128 | 0.5  | 0.03 | 2650 | 0.552 | 0.006  | 0.58  | 0.003  | 1000,972 | -9.89 | 0.03 | Incipient'   | 149 | 1 | 0.0352 | 0.0005 | 0.030 | 0.002 | 19  | 1  | 3.09  | 0.3  | 0,63  | 0.06 | 2,163 | 0,046 | 0,28 | 0,02 |
| 20 | 129 | 0.5  | 0.03 | 2650 | 0.552 | 0.006  | 0.58  | 0.003  | 999,949  | -9.89 | 0.03 | Generalized' | 202 | 1 | 0.0352 | 0.0005 | 0.038 | 0.002 | 29  | 1  | 3.91  | 0.34 | 0,63  | 0.06 | 2,737 | 0,052 | 0,33 | 0,02 |
| 20 | 130 | 0.5  | 0.03 | 2650 | 0.552 | 0.006  | 0.58  | 0.003  | 1000,162 | -9.89 | 0.03 | Generalized' | 288 | 1 | 0.0352 | 0.0005 | 0.048 | 0.001 | 48  | 2  | 4.94  | 0.35 | 0,63  | 0.06 | 3,458 | 0,059 | 0,39 | 0,02 |
| 21 | 131 | 0.5  | 0.03 | 2650 | 0.562 | 0.008  | 0.581 | 0.002  | 1003,804 | 9.9   | 0.1  | .No-motion'  | 55  | 1 | 0.0348 | 0.0005 | 0.013 | 0.002 | 5   | 0  | 1.33  | 0.23 | 0,61  | 0.06 | 1,689 | 0,041 | 0,23 | 0,03 |
| 21 | 132 | 0.5  | 0.03 | 2650 | 0.562 | 0.008  | 0.581 | 0.002  | 1001,818 | 9.9   | 0.1  | .No-motion'  | 96  | 1 | 0.0348 | 0.0005 | 0.019 | 0.003 | 10  | 0  | 1.94  | 0.34 | 0,61  | 0.06 | 2,464 | 0,050 | 0,30 | 0,04 |
| 21 | 133 | 0.5  | 0.03 | 2650 | 0.562 | 0.008  | 0.581 | 0.002  | 1002,965 | 9.9   | 0.1  | Incipient'   | 146 | 1 | 0.0348 | 0.0005 | 0.027 | 0.003 | 18  | 1  | 2.76  | 0.36 | 0,61  | 0.06 | 3,505 | 0,059 | 0,39 | 0,04 |
| 21 | 134 | 0.5  | 0.03 | 2650 | 0.562 | 0.008  | 0.581 | 0.002  | 1002,699 | 9.9   | 0.1  | Generalized' | 235 | 1 | 0.0348 | 0.0005 | 0.041 | 0.004 | 35  | 1  | 4.19  | 0.5  | 0,61  | 0.06 | 5,321 | 0,073 | 0,52 | 0,05 |
| 21 | 135 | 0.5  | 0.03 | 2650 | 0.562 | 0.008  | 0.581 | 0.002  | 1002,324 | 9.9   | 0.1  | Generalized' | 318 | 1 | 0.0348 | 0.0005 | 0.051 | 0.003 | 54  | 2  | 5.21  | 0.47 | 0,61  | 0.06 | 6,617 | 0,081 | 0,61 | 0,04 |
